**Title:** Evaluation of Knowledge, Practices, Attitude and Anxiety of Pakistan's Nurses towards COVID-19 during the Current Outbreak in Pakistan.

Alwani SS <sup>1</sup>, Majeed MM <sup>2\*</sup>, Hirwani MZ <sup>3</sup>, Rauf S <sup>4</sup>, Saad SM <sup>5</sup>, Shah H <sup>6</sup>, Hamirani F <sup>7</sup>

1. Shaheena Salman Alwani, Section Head Clinical Nursing, Liaquat National Hospital and Medical College, Karachi, Pakistan
2. Muhammad Mansoor Majeed\*, Assistant Professor, Department of Oral Biology, Altamash Institute of Dental Medicine , Karachi, Pakistan
3. Monia Zeeshan Hirwani, Head Nurse Eye & ENT Service line, Aga Khan University Hospital, Karachi, Pakistan
4. Shahzad Rauf, Associate Professor, Department of psychiatry, Bahria University Medical & Dental College, Karachi, Pakistan
5. Syed Muhammad Saad, Ophthalmologist, Layton Rahmatulla Benevolent Trust Hospital, Karachi, Pakistan
6. Sheikh Haroon Shah, Assistant Professor, Department of Dental and Maxillofacial Surgery, Liaquat National Hospital, Karachi, Pakistan
7. Faiq Hamirani, Resident of Psychiatry, Metro health System, Cleveland, USA.

**\*Corresponding Author:**

**Dr. Muhammad Mansoor Majeed**

BDS, MDS (DOW)

Assistant Professor, Department of Oral Biology,  
Altamash Institute of Dental Medicine, Karachi, Pakistan.

[mmasnoormajeed@gmail.com](mailto:mmasnoormajeed@gmail.com)

+923212661979

## **Abstract:-**

Since the emergence of novel corona virus the front line soldiers during this pandemic are the healthcare professionals because of their direct association with the patients. In the management of COVID-19 patient nurses play a significant role through proper care and preventive measures. Due to the contagious nature, fatality and no proper medicine, it is a risk to the health and life of nurses and has impact on their psychological health.

In the current study we accessed the knowledge, attitude, practices and anxiety levels of the nurses who are directly involved in the management of COVID-19 patients.

It was an online questionnaire based cross sectional survey targeted only those only nurses involved in the management of COVID-19 patients from different hospitals of Karachi, Pakistan. SPSS 21 was used for data analysis. Descriptive analysis, Chi Square and t-tests were applied. Value  $<0.05$  was considered significant.

Data of 78 nurses were analyzed .We observed that nurses possess good knowledge about COVID-19, its sources, symptoms, routes of transmission of virus and etc. The knowledge mean score was calculated  $14.67 \pm 3.36$ . Health department /Hospital and social media are the main sources of information regarding COVID-19. We investigated that 92.3% of the nurses had mild to very severe anxiety and anxiety levels are significantly higher among the females ( $P<0.05$ ).

We conclude that the nurses performing their duties with COVID-19 positive patients have good knowledge and attitude. But their anxiety levels are high. Psychological interventions along with training should be given.

**Keywords:** COVID-19, NURSES, ANXIETY, KNOWLEDGE, PAKISTAN

## **Introduction:-**

The latest member of Corona Virus family is COVID-19 and before this two more members of the same family were the Severe acute respiratory syndrome coronavirus (SARSCoV) and Middle East respiratory syndrome coronavirus (MERSCoV) (1). The novel Corona virus (COVID-19) which was identified in December 2019 have been declared a pandemic on 11<sup>th</sup> March 2020 as the virus reported to be highly contagious and deadly (2). By the time the total number of people infected and confirmed by the lab are more than 6 million and over 300000 have been died and the figure is raising exponentially (3). In Pakistan the first case of the virus was reported on 26<sup>th</sup> Feb 2020, a university student travelled from Iran, which was the epi center of this virus after China (4). By the time (31<sup>st</sup> May 2020) Pakistan has crossed the 70000 mark of reported cases and with more than 1400 deaths so far(5).

To control the spread CDS has recommended a guide line and protocol to follow. Mainly this virus spreads via aerosols, direct contact with the infected person or indirectly by touching surface that has virus on it. Fever, sore throat, dry cough and shortness of breath are the main symptoms (6). Up till now there is no specific treatment other than supportive treatment and its morbidity rates are less than 5%. The nature of virus is rapidly changing and new information regarding COVID-19 is pouring on daily basis. So updated knowledge and training is very necessary in order to fight with this deadly virus(6).

Healthcare professionals are the front line soldiers in the outbreak of any disease and are more susceptible to be infected because of their direct and close interaction with the diseased individuals (7, 8). They may not only be infected but in severe cases it may lead to the death of the healthcare individuals or same scenario may happen with their family members or closed ones (9). In the current pandemic thousands of healthcare professionals and healthcare workers infected in China

, Spain, Italy , France, Turkey and other parts of the world(10-12) .International council of Nursing (ICN) stated that over 90000 healthcare workers have been infected with COVID-19 and only the death toll of nurses is estimated to be 360 (13, 14).In Pakistan 100's health care professionals are reported COVID-19 positive along with many deaths (15, 16). Moreover a suicide case of 27 years old doctor is also reported in the turmoil of COVID 19 due to anxiety (17).

The current situation is the challenge for health care professionals to cope up with anxiety, stress, and depression, not only for their health and life but for the safety of family members. In such conditions it is not un common for the front line workers that includes medical doctors, dentist , nurses and other health care profession to develop psychological symptoms , mental and other health related problems (18). Health care workers involved with the testing and treatment of individuals with COVID-19 are more vulnerable to get infection than the general public as well as more prone to spread infection to their loved ones and this may also results in psychological distress (19, 20). Furthermore during the episodes of SARS and MERS multiple cases of panic attacks, anxiety, stress even suicides have been reported (3, 21-23).

The transmission of the disease among the HCP is linked with the improper knowledge, training, protection, not following the recommended protocols or guideline, absence of isolation rooms and also the lack of knowledge and awareness regarding the course and spread of the disease (24). It is well documented that proper knowledge of the disease may have the positive impact on the attitude and practices thus less chances of infection (25).

Nursing is the largest healthcare profession in the world, with approximately 20 million nurses worldwide(26).Along with the other healthcare professional nurses plays a pivotal role in healthcare setup in prevention, infection control, isolation, containment monitoring of the patients and because of their unique patient-facing nature, there are occupational risks to providing care

during the COVID-19 outbreak (27) and it is also reported that chances of occupational exposure is relatively higher in nurses (28). Moreover previous studies have shown also higher level of anxiety and depression among the nurses due to their long interaction with the patients and nature of their job (29-31). Deprived mental health among nurses may not only be damaging to them but may also impede effect their professional routine and in turn, the quality of patient care provided (32) as it is evident that wellbeing of the mental state is crucial to in order to manage infectious diseases (18, 33).

The current study aimed to assess the knowledge, attitude and anxiety levels toward COVID-19 among Nurses of Karachi, Pakistan who are directly involved with COVID-19 patients. The findings will help us to evaluate the knowledge and anxiety levels among the nurses associated with patients suffering from Corona Virus in different hospitals of Karachi, Pakistan and the results of this study will also help the authorities to organize the necessary educational programs in order to provide up-to-date information and deliver the best practice to control the COVID-19 disease and to arrange counseling sessions or psychiatrist/psychological intervention to control the psychological and mental problems.

## **Methodology:-**

In this study we recruited those nurses who were directly involved with patients having COVID-19 in different hospitals of Karachi, Pakistan. Due to the pandemic and lock down an online survey on Google form was conducted with limit to single input. A validated questionnaire that was previously used in Iran (34) with few changes was sent to the eligible participants as per convenience snowball sampling. Social media platforms WhatsApp and Facebook Messenger were used to deliver the questionnaire. To every participant a time of 6 days were given from 15<sup>th</sup> May 2020 to 20<sup>th</sup> May 2020. Our questionnaire had questions covering demographics, knowledge, Practices and attitude. As per Lickerts scale we had questions that evaluated the nurses' anxiety regarding their, their family infection with 2019-nCoV and anxiety about aerosol generating procedures.

According to Raosoft the minimum required sample size was 67 considering a response rate of 50%, 90% confidence interval (CI) and 10% margin of error. Ethical approval was obtained from the ethics and review committee of Altamash Institute of Dental Medicine, Karachi, Pakistan (AIDM/EC/04/2020/03). The participation was voluntary, informed consent along with the approval to publish the outcomes of the study was obtained. SPSS 21 used for data analysis. Chi Square and t-tests were applied to compare different factors. Value <0.05 was considered significant.

## **Results:-**

Total 85 forms were submitted and due to incomplete submissions and errors we excluded 7 forms so the data of 78 nurses have been analyzed.

Among the participants, 38 (48.71) were females and 40 (51.28%) were males. The difference among the gender is not significant ( $P=0.821$ ) (**Table1**)

In the current study 37 (47.43%) of the participants were below 30 years of age, 34 (43.6%) were in the age group of 31 to 40 years and 5 (6.4%) were between 41- 50years old and 2 (2.6%) participants were above 50 years of age. We found that 8(10.3%) were having Master's degree in nursing, 33 (42.3%) of the participant were holding a Bachelor's degree and 31 (39.7%) nurses were equipped with diploma in nursing and 6 (7.7%) were having education till high school or less. . We found that 30 (38.5 %) of the nurses were having experience of less than 5 years. The maximum number of nurses were having experience of 5-15 years i.e. 34 (43.6%) and 14 (17.9%) were having experience of 16 years or more. There is a statistically significant difference of age, education and working experience among the participants. (**Table1**)

In the current study we found that 12 (15.38%) of nurses reported that they were infected with COVID-19 ( $P>0.05$ ) and 56(71.79%) of the participants claimed that their colleagues have been infected with the virus ( $P<0.05$ ). Family member of 14(17.94%) of the participants found positive for COVID-19 ( $P>0.05$ ).

The bulk of the participants were aware about the treatment options, routes of transmission and risk factors for CVID-19. The knowledge score ranged from 5 to 19 and the mean knowledge score of nurses was  $14.67 \pm 3.36$  ( $P<0.05$ ). All of participants knew that COVID19 is a viral disease and it is contagious. Participants had good knowledge regarding the routes of transmission of the virus, Main symptoms, preventive measures and treatment options. Substantial number of the



participants answered correctly (**Table 2**) Three main symptoms of COVID-19 i.e. Fever, Shortness of breath and Dry Cough were mentioned by 98.71, 98.71 and 91.02% of the nurses respectively. (**Table 2**)

The main sources of COVID-19 information are hospital or health ministry and social media 67(85.89%) and 47 (60.25%) respectively, followed by Colleagues OR Friends, Research Articles, Television and Radio, etc. Some of the participants were actively involved in taking webinars and reading research material on internet (**Fig 1**).

Significant number of nurses have anxiety ( $p=0.00$ ). The number of nurses having no or mild anxiety are 6 (7.7%) and 6 (7.7%) respectively and those having moderate, high and very high levels of anxiety are 19 (24.4%), 24 (30.8%) and 23 (29.5%) respectively (**FIG 2**). Significant Difference in the levels of anxiety has been observed among the genders ( $p=0.016$ ) Female are more anxious as compared to males (**FIG 2**).The mean self-anxiety score to be infected for participant was found to be  $3.60 \pm 1.25$  and for their family the mean anxiety level was recorded  $3.85 \pm 1.31$ . Anxiety about performing measures like aerosol producing procedures, taking nasopharyngeal swab, nebulizing, suctioning etc. was calculated  $3.30 \pm 1.33$  (**Fig 3**).We found that the anxiety levels are significantly higher among those individuals who have been previously infected with COVID-19 ( $P=0.013$ ).

As per our results around 80% of the nurses put face masks, protective clothing's, place suspected patients in ventilated single room, routinely clean and disinfect environmental surface, frequent hand cleaning and follow respiratory hygiene and cough etiquette and practice social distancing. (**Table 3**).

Current study findings demonstrates a positive attitude of the nurses towards COVID-19. 75(96%) nurses who have dedicated themselves for COVID-19 patients willing to continue their work.

Large number of nurses 72 (92.3%) want more people to be trained to fight with COVID-19 and 59(75.6%) of the nurses doesn't want more attendants with the patients in the hospital (**Table 3**).

## **Discussion:-**

To best of our knowledge, this is the first study that has targeted only the Nurses in order to assess their knowledge and practices towards COVID 19 and their level of anxiety in Pakistan. This study was being conducted when Pakistan crossed the mark of 40000 reported cases of COVID 19. In the current study the participants were the nurses who were directly involves with COVID-19 patients. And we assessed their knowledge, attitude and practice in order to shield them and prevent the further spread of the infection. It is reported that nurses are more prone to infection due to the close contact with the patients (35). Moreover we analyzed the anxiety levels among the nurses as studies suggests that in case of big disasters mental health issues may arise (36).

In this study the data of 78 participants was analyzed. All the participants were the nurses that have been involved in the management of patients' diagnosed with COVID-19. Total number of males were 40 and females were 38. There is no significant difference among the gender. Usually in other studiers higher female to male ratio has been observed(28) but contrary to other studies in our study we found higher number of males. This is because of the reason that here males are usually the bread earners and they have no other option on the other hand many female nurses have quit their jobs and resigned due to the family burden(37).

In this this study we analyze a significant differences in age, educational level and experience. We further investigate that 90% of the nurses are below 40 years of age and majority have bachelor's degrees or associated diplomas in nursing. Similar finding witnessed in other studies (34, 38).

The finding of the current study showed that nurses in Karachi have sufficient knowledge regarding different aspects of COVID-19. In a recent study conducted on health care professionals in Pakistan reveled that HCP have good knowledge towards COVID-19 (39, 40). Moreover different studies performed in different parts of the world showed the strikingly similar results (34,

41, 42). Contradictory to the findings of our study, a research conducted in Pakistan few weeks before reported low level of knowledge among the nurses(43).Previous studies in different parts of the world during epidemic revealed that the rate of influx of information is much high during the current pandemic(44, 45).

We appraised that Health department or hospital and social media and are the two major source of information regarding COVID 19. Our results are further endorsed by different studies stated that the previously mentioned sources are the primary sources of information regarding (38, 46, 47) .

In the current study we have observed that nurses' follows correct protocols in order to prevent themselves and patients. Such practices are very important in order to control the cross infection. Practices are associated with knowledge, work experience, and other factors.

In this study 57 (73.07%) participants have received formal training to cater the COVID positive patients and infection control. Contrary to our findings the previous study conducted in Pakistan showed that 50% of the nurses had undergone any training and have limited knowledge about COVID-19(43). It is also possible that the training could be the reason of increased awareness and knowledge among nurses which is evident in the current study. Zhong et al stated that with good knowledge and practice and following the protective measures, HCPs not only save themselves but show good message of awarness to the community (48).

We investigated that 12 (15.38%) nurses were infected with COVID 19 and 56(71.79%) of the nurses have colleague(s) that had been infected with the COVID 19. Moreover 14(17.94%) nurses reported that their family member(s) had been infected. Health Care Workers shows high prevalence of getting infection with any contagious or non-contagious infection (49). Furthermore data from other countries are in accordance with our findings(50) In Italy 12 % of

the nurses got COVID-19. In Brazil it is also reported that 1000s of nurses have been infected and 100s dead (51). Same are the conditions in other countries as per reports (52-54) Moreover we believe that higher rate of infection and mortality among the healthcare professional and their family members could be one of the cause of anxiety. But on the contrary a study in Iran showed totally different results with zero infected case (34).

Likewise in different researches, in our study significant majority of the participants believes that there is dire need of more trained workers in order to accommodate the need that is aroused because of the current pandemic (55, 56).

Anxiety is an undesirable emotional condition perceived individually and it is reported that anxiety is one the commonest psychological hurdle of nurses (28). In our study 72 (91.3%) nurses have the overall anxiety ranges from mild to very severe. In a similar study on health care workers conducted in China expressed the similar results (57) and in another study that was purely conducted over nurses showed the higher level of anxiety among the nurses which further validates our findings, furthermore in accordance with the results of our study it also showed the anxiety for the family member (33, 34, 58). Moreover previous studies have also shown higher level of anxiety and depression among the nurses due to their long interaction with the patients and nature of their job (29). Similar findings were reported by other studies during SARS and MERS (3, 59, 60). According to the findings of this study females exhibited more anxiety as compare to males which is in agreement to the outcome of other studies (61, 62). In our opinion the high rate of anxiety is because of unavailability of personal protective equipment (PPE), lack of counselling sessions, deficiency of proper health care facilities etc. Moreover job stress , demands , exertions may not only have negative impact on the psychology and mental health but also on the general wellbeing(63, 64). Moreover due to the social media and easy access to the current news and

information the anxiety and obsession has been increased (65, 66). Anxiety of nurses towards their family member to be infected with COVID-19 is significantly on the very severe side. Studies have shown that due to the highly contagious nature of this virus healthcare professionals are in stress and depression as they might transfer the infection to their family members(41). In order to reduce the anxiety counseling sessions should be organized. Same recommendations were given in parallel studies as the wellbeing of the mental state is crucial to in order to manage infectious diseases (18, 33).

### **Conclusion:**

This study concludes that the Nurses working with COVID-19 patients have good knowledge regarding symptoms, route of infection, treatment options etc. Majority of the Nurses in Karachi, Pakistan showed typical signs of anxiety. Therefore it is recommended that proper counseling sessions may help them cope with the pandemic. Proper training and mentorship along with fortnightly or monthly refresher course may aid into tackling such situations.

### **Conflict of Interest:-**

The authors declare that they do not have any interests that could constitute a real, potential or apparent conflict of interest with respect to their involvement in the publication

**Funding:** None

**Acknowledgements:** We acknowledge the support of the ethic and review committee of Altamash Institute of Dental Medicine, Karachi, Pakistan. We would like to extend heartfelt graciousness to Mr. Muhammad Saqlain of Quaid –e-Azam University, Pakistan and MS. Marzieh Nemati , Bahareh Ebrahimi and Fatemeh Nemati of Shiraz University of Medical Sciences, Iran and to all the participants and people who provided support at every step of the research.

### **Limitations:-**

The sample size was limited as the study only comprises of the nurses fighting against COVID-19 from Karachi, Pakistan so the results cannot be generalized. It was an online survey so factors like dis honest answers and biasness should be considered.

### **Author's contribution:-**

AS and MM conceived the study and designed the questionnaire. HM, SM and SH collected data. SM and SH performed statistical analyses and prepared tables and figures. MM, HF and RS drafted the manuscript. MM supervised the project and is responsible for the integrity of the research. All authors contributed comprehensively contributed in writing and critically revised and approved the final draft of the manuscript.

## References

1. Zhou P, Yang X-L, Wang X-G, Hu B, Zhang L, Zhang W, et al. A pneumonia outbreak associated with a new coronavirus of probable bat origin. 2020;579(7798):270-3.
2. WHO. WHO Director-General's opening remarks at the media briefing on COVID-19 - 11 March 2020 [cited 2020 11 March]. Available from: <https://www.who.int/dg/speeches/detail/who-director-general-s-opening-remarks-at-the-media-briefing-on-covid-19---11-march-2020>.
3. Chua SE, Cheung V, Cheung C, McAlonan GM, Wong JW, Cheung EP, et al. Psychological effects of the SARS outbreak in Hong Kong on high-risk health care workers. 2004;49(6):391-3.
4. Saqlain M, Munir MM, Ahmed A, Tahir AH, Kamran SJD, Perspectives T. Is Pakistan prepared to tackle the coronavirus epidemic? 2020:1-2.
5. Pakistan Go. COVID-19 Cases in Pakistan 2020 [updated 31st Mayy, 2020 - 09:51 am (GMT+5); cited 2020 25th May]. Available from: <http://www.covid.gov.pk/stats/pakistan>.
6. CDC. How COVID-19 Spreads 2020 [Available from: <https://www.cdc.gov/coronavirus/2019-ncov/prevent-getting-sick/how-covid-spreads.html>].
7. Alharthy N, Alrajeh OA, Almutairi M, Alhajri AJIoA, Research BM. Assessment of anxiety level of emergency health-care workers by generalized anxiety disorder-7 tool. 2017;7(3):150.
8. Paterson JL, Sofianopoulos S, Williams BJEMA. What paramedics think about when they think about fatigue: Contributing factors. 2014;26(2):139-44.
9. Reid LJB. Diminishing returns? Risk and the duty to care in the SARS epidemic. 2005;19(4):348-61.
10. Lai J, Ma S, Wang Y, Cai Z, Hu J, Wei N, et al. Factors associated with mental health outcomes among health care workers exposed to coronavirus disease 2019. 2020;3(3):e203976-e.
11. Chen W, Huang YJA, Analgesia. To Protect Health Care Workers Better, To Save More Lives With COVID-19. 2020.
12. ERSOY AJTJoIM. The frontline of the COVID-19 pandemic: Healthcare workers.2(2):31-2.
13. Nurses TICo. Immediate and serious threat: ICN calls on WHO member states to collect and share data on health worker COVID-19 infection rates and deaths 2020 [updated 18 May 2020; cited 2020 18th May]. Available from: <https://www.icn.ch/news/immediate-and-serious-threat-icn-calls-who-member-states-collect-and-share-data-health-worker>.
14. Mantovani C. Over 90,000 health workers infected with COVID-19 worldwide: nurses group. Reuters. 2020 MAY 6, 2020.
15. Geo.tv. COVID-19 outbreak: 440 doctors, 111 nurses and 215 paramedics infected so far 2020 [Available from: <https://www.geo.tv/latest/287375-increasing-number-of-health-professionals-testing-positive-for-the-coronavirus-across-pakistan>].
16. Pakistan Go. PAKISTAN CASES DETAILS 2020 [updated 11 May, 2020; cited 2020 11 May]. Available from: <http://www.covid.gov.pk/stats/pakistan>.
17. Gulzar F. Coronavirus: Young doctor commits suicide in Pakistan due to lack of protective measures 2020 [cited 2020 May 07,]. Available from: <https://gulfnnews.com/world/asia/pakistan/coronavirus-young-doctor-commits-suicide-in-pakistan-due-to-lack-of-protective-measures-1.1588844318582>.
18. Xiang Y-T, Yang Y, Li W, Zhang L, Zhang Q, Cheung T, et al. Timely mental health care for the 2019 novel coronavirus outbreak is urgently needed. 2020;7(3):228-9.



19. Neto MLR, Almeida HG, Esmeraldo JDa, Nobre CB, Pinheiro WR, de Oliveira CRT, et al. When health professionals look death in the eye: the mental health of professionals who deal daily with the 2019 coronavirus outbreak. 2020;112972.
20. Ashtari S, Vahedian-Azimi A, Moayed M, Rahimibashar F, Shojaei S, Pourhoseingholi M. Compare the severity of psychological distress among four groups of Iranian society in COVID-19 pandemic. 2020.
21. Jeong H, Yim HW, Song Y-J, Ki M, Min J-A, Cho J, et al. Mental health status of people isolated due to Middle East Respiratory Syndrome. 2016;38.
22. Chan SMS, Chiu FKH, Lam CWL, Leung PYV, Conwell YJJoGPAjotpoll, sciences a. Elderly suicide and the 2003 SARS epidemic in Hong Kong. 2006;21(2):113-8.
23. Bai Y, Lin C-C, Lin C-Y, Chen J-Y, Chue C-M, Chou PJPS. Survey of stress reactions among health care workers involved with the SARS outbreak. 2004;55(9):1055-7.
24. Wu Z, McGoogan JMJJ. Characteristics of and important lessons from the coronavirus disease 2019 (COVID-19) outbreak in China: summary of a report of 72 314 cases from the Chinese Center for Disease Control and Prevention. 2020;323(13):1239-42.
25. McEachan R, Taylor N, Harrison R, Lawton R, Gardner P, Conner MJAoBM. Meta-analysis of the reasoned action approach (RAA) to understanding health behaviors. 2016;50(4):592-612.
26. Lancet T. 2020: unleashing the full potential of nursing. 2019;394(10212):1879.
27. Smith GD, Ng F, Li WHCJJoCN. COVID-19: Emerging compassion, courage and resilience in the face of misinformation and adversity. 2020;29(9-10):1425.
28. Mo Y, Deng L, Zhang L, Lang Q, Liao C, Wang N, et al. Work stress among Chinese nurses to support Wuhan for fighting against the COVID-19 epidemic. 2020.
29. Wong TW, Yau JK, Chan CL, Kwong RS, Ho SM, Lau CC, et al. The psychological impact of severe acute respiratory syndrome outbreak on healthcare workers in emergency departments and how they cope. 2005;12(1):13-8.
30. Chiang Y-M, Chang YJHP. Stress, depression, and intention to leave among nurses in different medical units: Implications for healthcare management/nursing practice. 2012;108(2-3):149-57.
31. Maharaj S, Lees T, Lal SJIjoer, health p. Prevalence and risk factors of depression, anxiety, and stress in a cohort of Australian nurses. 2019;16(1):61.
32. Brandford AA, Reed DBJWh, safety. Depression in registered nurses: a state of the science. 2016;64(10):488-511.
33. Kang L, Li Y, Hu S, Chen M, Yang C, Yang BX, et al. The mental health of medical workers in Wuhan, China dealing with the 2019 novel coronavirus. 2020;7(3):e14.
34. Nemati M, Ebrahimi B, Nemati FJAoCID. Assessment of Iranian nurses' knowledge and anxiety toward COVID-19 during the current outbreak in Iran. 2020;15(COVID-19).
35. Bernard H, Fischer R, Mikolajczyk RT, Kretzschmar M, Wildner MJEid. Nurses' contacts and potential for infectious disease transmission. 2009;15(9):1438.
36. Shioyama A, Uemoto M, Shinfuku N, Ide H, Seki W, Mori S, et al. The mental health of school children after the Great Hanshin-Awaji Earthquake: II. Longitudinal analysis. 2000;102(5):481-97.
37. S J. <https://gulfnews.com/world/asia/pakistan/why-pakistans-health-workers-are-against-easing-the-covid-19-lockdown-1.1589469775577>. Why Pakistan's health workers are against easing the COVID-19 lockdown. 2020 May 14, 2020.

38. Giao H, Han NTN, Van Khanh T, Ngan VK, Van Tam V, Le An PJAPJTM. Knowledge and attitude toward COVID-19 among healthcare workers at District 2 Hospital, Ho Chi Minh City. 2020;13.
39. Saqlain M, Munir MM, Rehman SU, Gulzar A, Naz S, Ahmed Z, et al. Knowledge, attitude, practice and perceived barriers among healthcare professionals regarding COVID-19: A Cross-sectional survey from Pakistan. 2020.
40. Ahmed N, Shakoor M, Vohra F, Abduljabbar T, Mariam Q, Rehman MAJJoMS. Knowledge, Awareness and Practice of Health care Professionals amid SARS-CoV-2, Corona Virus Disease Outbreak. 2020;36(COVID19-S4).
41. Giao H, Han NTN, Van Khanh T, Ngan VK, Van Tam V, Le An PJAPJoTM. Knowledge and attitude toward COVID-19 among healthcare workers at District 2 Hospital, Ho Chi Minh City. 2020:13.
42. Kamineni SRT, Balu P, Sivagananam P, Chellapandian P, Chelladurai UM, Jayasheelan VP, et al. Knowledge of COVID-19 among nursing and Allied health care professionals working in tertiary care hospital. 2020;11(SPL1):103-9.
43. Khan S, Khan M, Maqsood K, Hussain T, Zeeshan MJJoMV. Is Pakistan prepared for the COVID-19 epidemic? A questionnaire-based survey. 2020.
44. Cinelli M, Quattrocioni W, Galeazzi A, Valensise CM, Brugnoti E, Schmidt AL, et al. The covid-19 social media infodemic. 2020.
45. Chan A, Nickson C, Rudolph J, Lee A, Joynt GJA. Social media for rapid knowledge dissemination: early experience from the COVID-19 pandemic. 2020.
46. Saqlain M, Munir MM, ur Rehman S, Gulzar A, Naz S, Ahmed Z, et al. Knowledge, attitude, practice and perceived barriers among healthcare professionals regarding COVID-19: A Cross-sectional survey from Pakistan. 2020.
47. Karasneh R, Al-Azzam S, Muflih S, Soudah O, Hawamdeh S, Khader YJRiS, et al. Media's effect on shaping knowledge, awareness risk perceptions and communication practices of pandemic COVID-19 among pharmacists. 2020.
48. Zhong B-L, Luo W, Li H-M, Zhang Q-Q, Liu X-G, Li W-T, et al. Knowledge, attitudes, and practices towards COVID-19 among Chinese residents during the rapid rise period of the COVID-19 outbreak: a quick online cross-sectional survey. 2020;16(10):1745.
49. Catton H. ICN calls for data on healthcare worker infection rates and deaths 2020 [cited 2020 6th May ]. Available from: <https://www.icn.ch/news/icn-calls-data-healthcare-worker-infection-rates-and-deaths>.
50. Kimball AJMM, report mw. Asymptomatic and presymptomatic SARS-CoV-2 infections in residents of a long-term care skilled nursing facility—King County, Washington, March 2020. 2020;69.
51. CGTN. Nurses dying from COVID-19 in Brazil 2020 [Available from: <https://newsus.cgtn.com/news/2020-05-28/Nurses-dying-from-COVID-19-in-Brazil-QQom54EAjS/index.html>].
52. M S. High COVID-19 infection rates among doctors and nurses in Germany 2020 [cited 2020 30th May]. Available from: <https://www.wsfs.org/en/articles/2020/05/25/doct-m25.html>.
53. A MA. 138 nurses test Covid-19 positive in KP. The News. 2020 May 30, 2020.
54. E E. COVID-19 cases among health care workers top 62,000, CDC reports. NBC NEWS. 2020 27th May 2020.
55. Mukhtar PSJJoEN. Mental Wellbeing of Nursing Staff during the COVID-19 Outbreak: A Cultural Perspective. 2020.

56. Hetland B, Lindroth H, Guttormson J, Chlan LLJH, Cardiopulmonary LTJo, Care A. 2020- The Year that Needed the Nurse: Considerations for Critical Care Nursing Research and Practice Emerging in the Midst of COVID-19. 2020.
57. Zhou M, Tang F, Wang Y, Nie H, Zhang L, You G, et al. Knowledge, attitude and practice regarding COVID-19 among health care workers in Henan, China. 2020.
58. Taghizadeh F, Hassannia L, Moosazadeh M, Zarghami M, Taghizadeh H, Dooki AF, et al. Anxiety and Depression in Health Workers and General Population During COVID-19 Epidemic in IRAN: A Web-Based Cross-Sectional Study. 2020.
59. Maunder R, Hunter J, Vincent L, Bennett J, Peladeau N, Leszcz M, et al. The immediate psychological and occupational impact of the 2003 SARS outbreak in a teaching hospital. 2003;168(10):1245-51.
60. Bukhari EE, Temsah MH, Aleyadhy AA, Alrabiaa AA, Alhboob AA, Jamal AA, et al. Middle East respiratory syndrome coronavirus (MERS-CoV) outbreak perceptions of risk and stress evaluation in nurses. 2016;10(08):845-50.
61. Rajkumar RPJAjop. COVID-19 and mental health: A review of the existing literature. 2020:102066.
62. Li S, Li L, Zhu X, Wang Y, Zhang J, Zhao L, et al. Comparison of characteristics of anxiety sensitivity across career stages and its relationship with nursing stress among female nurses in Hunan, China. 2016;6(5):e010829.
63. Chou L-P, Li C-Y, Hu SCJBo. Job stress and burnout in hospital employees: comparisons of different medical professions in a regional hospital in Taiwan. 2014;4(2):e004185.
64. Khamisa N, Oldenburg B, Peltzer K, Ilic DJIjoer, health p. Work related stress, burnout, job satisfaction and general health of nurses. 2015;12(1):652-66.
65. Xiao H, Zhang Y, Kong D, Li S, Yang NJMsmimjoe, research c. The effects of social support on sleep quality of medical staff treating patients with coronavirus disease 2019 (COVID-19) in January and February 2020 in China. 2020;26:e923549-1.
66. Dsouza DD, Quadros S, Hyderabadwala ZJ, Mamun M. Aggregated COVID-19 suicide incidences in India: Fear of COVID-19 infection is the prominent causative factor. 2020.

**Table 1: Demographic Characteristics of the Participants**

| <b>Variable</b>          | <b>Number (%)</b>           | <b>P value</b> |       |
|--------------------------|-----------------------------|----------------|-------|
| <i>Gender</i>            | Male                        | 40 (51.3)      | 0.821 |
|                          | Female                      | 38 (48.7)      |       |
|                          |                             | 78 (100)       |       |
| <i>Age</i>               | 18-30                       | 37 (47.4)      | 0.00  |
|                          | 31-40                       | 34 (43.6)      |       |
|                          | 41-50                       | 5 (6.4)        |       |
|                          | 51-60                       | 2 (2.6)        |       |
|                          |                             |                |       |
| <i>Educational Level</i> | High School Diploma or less | 6 (7.7)        | 0.00  |
|                          | Diploma In Nursing          | 31 (39.7)      |       |
|                          | Bachelor degree in Nursing  | 33 (42.3)      |       |
|                          | Master degree In Nursing    | 8 (10.3)       |       |
|                          |                             |                |       |
| <i>Work Experience</i>   | 0-5 years                   | 30 (38.46)     | .013  |
|                          | 6-15                        | 34 (43.58)     |       |
|                          | 16 and More                 | 14 (17.9)      |       |
|                          |                             |                |       |

**Table 2: Knowledge of the Participants**

| Questions                                                                 | Options                                                     | Number (%)  |
|---------------------------------------------------------------------------|-------------------------------------------------------------|-------------|
| <b>COVID-19 Mortality Rate</b>                                            | < 5%                                                        | 44 (56%.41) |
|                                                                           | 10% -20%                                                    | 19 (24.35%) |
|                                                                           | 21% - 30%                                                   | 5 (6.41%)   |
|                                                                           | > 30%                                                       | 10 (12.82%) |
| <b>Incubation Period</b>                                                  | 2-14 days                                                   | 43 (55.12%) |
|                                                                           | 2-7 days                                                    | 2 (2.56%)   |
|                                                                           | 7-14 days                                                   | 30 (38.56%) |
|                                                                           | 7-21 days                                                   | 3 (3.84%)   |
| <b>Symptoms of COVID-19</b>                                               | Fever                                                       | 77(98.71%)  |
|                                                                           | Dry Cough                                                   | 71 (91.02%) |
|                                                                           | Runny Nose                                                  | 56 (71.79%) |
|                                                                           | Shortness of Breath                                         | 77 (98.71%) |
|                                                                           | Joint/Muscle ache                                           | 42 (53.84%) |
|                                                                           | Red Eyes                                                    | 35 (44.87%) |
|                                                                           | Headache                                                    | 42 (53.84%) |
|                                                                           | Diarrhea                                                    | 32 (41.02%) |
| <b>COVID 19 is a</b>                                                      | Wet cough                                                   | 30 (38.46%) |
|                                                                           | Viral Disease                                               | 78 (100%)   |
|                                                                           | Protozoal Disease                                           | 0 (0.0%)    |
|                                                                           | Bacterial Disease                                           | 0 (0.0%)    |
| <b>Route of Transmission</b>                                              | Fungal Disease                                              | 0 (0.0%)    |
|                                                                           | Airborne                                                    | 62 (79.48%) |
|                                                                           | Direct Contact                                              | 68 (87.17%) |
|                                                                           | Droplet                                                     | 70 (89.74%) |
|                                                                           | Indirect Contact                                            | 56 (71.79%) |
|                                                                           | Sexual Contacts                                             | 23 (29.48%) |
|                                                                           | Fecal-Oral Route                                            | 29 (37.17%) |
| <b>Factors considered to identify patients at risk of having COVID-19</b> | Others                                                      |             |
|                                                                           | Presence of symptoms of Respiratory Distress                | 70 (89.74%) |
|                                                                           | Presence of symptoms of Gastroenteritis                     | 20 (25.64%) |
|                                                                           | History of travel to areas experiencing upsurge of COVID-19 | 68 (84.61%) |
| <b>What is the routine treatment of COVID 19?</b>                         | History of contact with possible infected patients          | 66 (84.61%) |
|                                                                           | No Treatment                                                | 18 (23.07%) |
|                                                                           | Supportive Treatment                                        | 66 (84.61%) |
|                                                                           | Vaccine                                                     | 6 (7.69%)   |
|                                                                           | Not sure                                                    | 14 (8.97%)  |
|                                                                           | Other (Onion, Steam, Ablution)                              | 4           |

**Table 3: Practices and Attitude of Nurses towards COVID-19**

| <b>Practices and Attitude of Nurses towards COVID-19</b>                                  |                 |           |
|-------------------------------------------------------------------------------------------|-----------------|-----------|
| <b>Item</b>                                                                               | <b>Response</b> |           |
|                                                                                           | <b>Yes</b>      | <b>No</b> |
| <b>Put facemask on known or suspected patients</b>                                        | 75              | 3         |
| <b>Place known or suspected patients in adequately ventilated single rooms</b>            | 68              | 10        |
| <b>All health staff members wear protective clothing</b>                                  | 72              | 6         |
| <b>Avoid moving and transporting patients out of their area unless necessary</b>          | 70              | 8         |
| <b>Routinely clean and disinfect surfaces in contact with known or suspected patients</b> | 67              | 11        |
| <b>Clean and disinfect environmental surfaces</b>                                         | 64              | 14        |
| <b>Frequently clean hands by using alcohol-based hand rub or soap and water</b>           | 69              | 9         |
| <b>Safe injection practices (i.e., aseptic technique for parenteral medications)</b>      | 47              | 31        |
| <b>Respiratory hygiene / cough etiquette</b>                                              | 64              | 14        |
| <b>Practice social distancing</b>                                                         | 65              | 13        |
| <b>Do you see the need for more people to be trained by the medical staff?</b>            | 72              | 6         |
| <b>In a hospital do you prefer having more attendants with the patient?</b>               | 18              | 59        |
| <b>You want to continue work with COVID 19 patients?</b>                                  |                 |           |
| If we get Proper Training and PPE                                                         | 42              | 3         |
| YES                                                                                       | 29              |           |
| If we get special allowance                                                               | 04              |           |
| Total                                                                                     | <u>75</u>       |           |

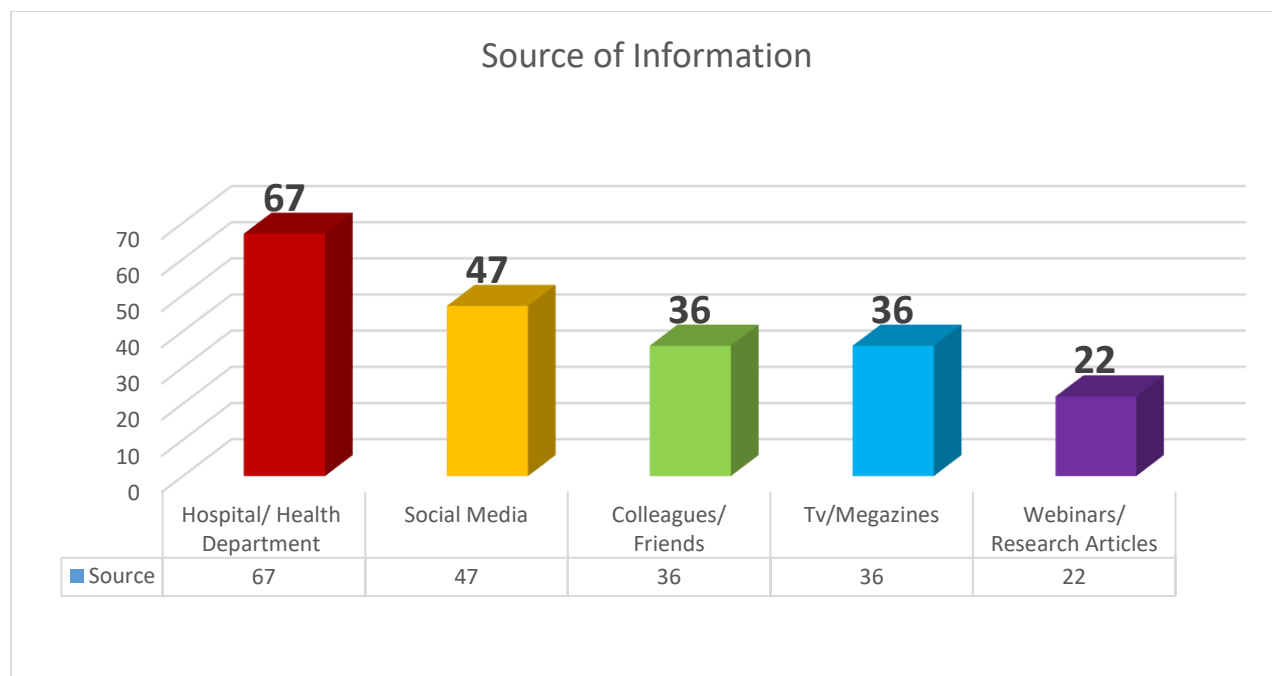

**Fig 1: Source of Information**

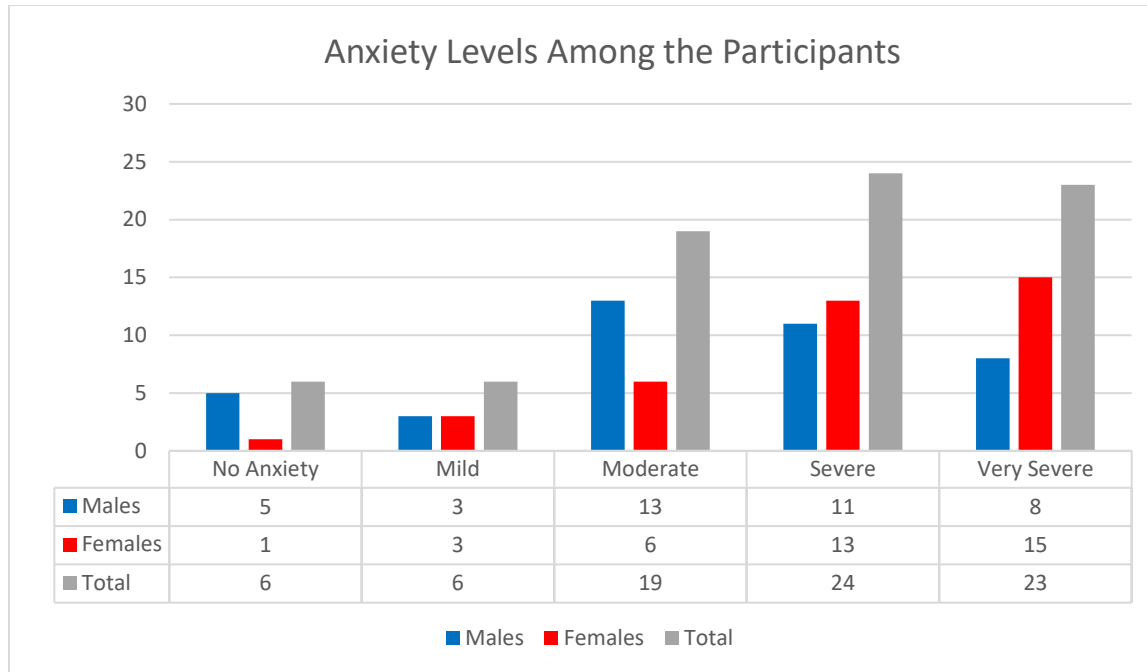

**Fig 2: No of males, females and total number of participant with no, mild, moderate, severe and very severe anxiety.**

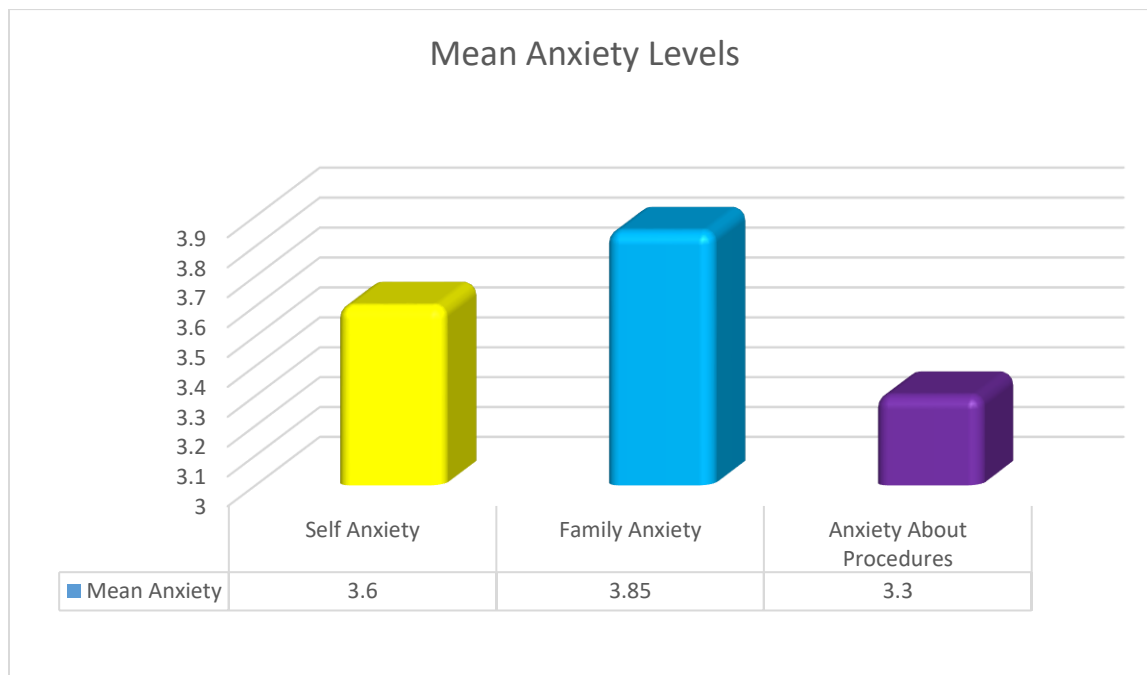

**Fig 3: Mean Anxiety levels**
